# Supplementary material for: A bio-inspired versatile free-standing membrane for oral cavity microenvironmental monitoring and remineralization to prevent dental caries
Source: Royal Society of Chemistry journal article supplement (doi:10.1039/d2mh01079h), 2022-11-09
Supplement: d2mh01079h1.pdf [file d2mh01079h1.pdf]

*Supporting Information*

# **A Bio-inspired Versatile Free-Standing Membrane for Oral Cavity Microenvironmental Monitoring and Remineralization to Prevent Dental Caries**

*Kai Cheng<sup>a#</sup>, Peng She<sup>b#</sup>, Hong Wang<sup>b</sup>, Zengkai Wang<sup>a</sup>, Liwei Zhang<sup>a</sup>, Xu Tang<sup>a</sup>, Liang Yuan<sup>a</sup>, Yonghai Feng<sup>a</sup>, Xiaolu Song<sup>a</sup>, Guoqing Pan<sup>a</sup>, Juan Yang<sup>c</sup>, Lei Liu<sup>a\*</sup>*

<sup>a</sup>Institute for Advanced Materials, Jiangsu University, Zhenjiang, China, 212013.

<sup>b</sup>Department of Stomatology, The Affiliated People's Hospital of Jiangsu University, Zhenjiang, 212001, China

<sup>c</sup>School of Materials Science and Engineering, Jiangsu University, Zhenjiang, China, 212013.

# These authors contributed equally.

\* E-mail: liul@ujs.edu.cn

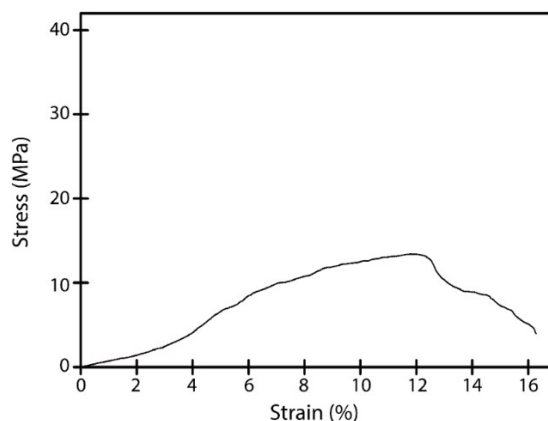

**Figure S1.** (a-c) The stress-strain curve of SF membrane.

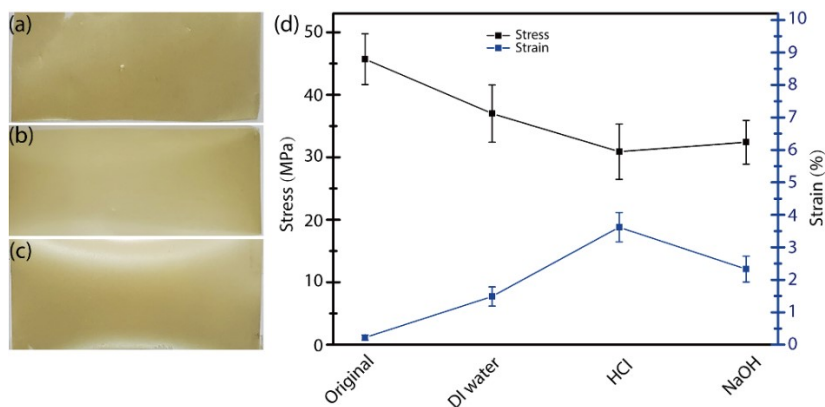

**Figure S2.** (a-c) The photograph of SF/TiO<sub>2</sub> NTBs membrane immersed in different solution for 30 min at room temperature, DI water (a), HCl (b), NaOH (c). The maximum elastic strain and maximum stress of SF/TiO<sub>2</sub> NTBs under different conditions (d).

Fig. S2 (a-c) shows the photograph of SF/TiO<sub>2</sub> NTBs membrane immersed in DI water, HCl (pH=1) and NaOH (pH=14) for 30 min at room temperature, all samples still maintains excellent integrity. Moreover, the maximum elastic strain increases but the maximum stress decreased obviously under the wet condition, include in acid or alkaline solution as we can see from Fig. S1 d. These results suggested that the SF/TiO<sub>2</sub> NTBs membrane has the advantage of corrosion-resistant property.

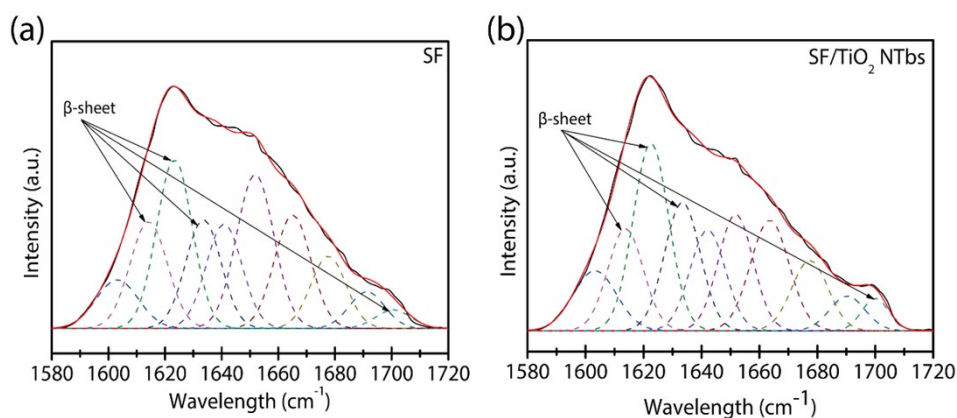

**Figure S3.** The FT-IR peak splitting spectra of SF membrane (a) and SF/TiO<sub>2</sub> NTBs membrane

(b).

Figure S3 shows the FT-IR peak splitting spectra of SF membrane (a) and SF/TiO<sub>2</sub> NTbs membrane (b), the content of  $\beta$ -sheets of SF membrane and SF/TiO<sub>2</sub> NTbs membrane was 42.58 % and 46.24 %, respectively. We can see the contents of  $\beta$ -sheets had increasing trends but shows no obvious variation.

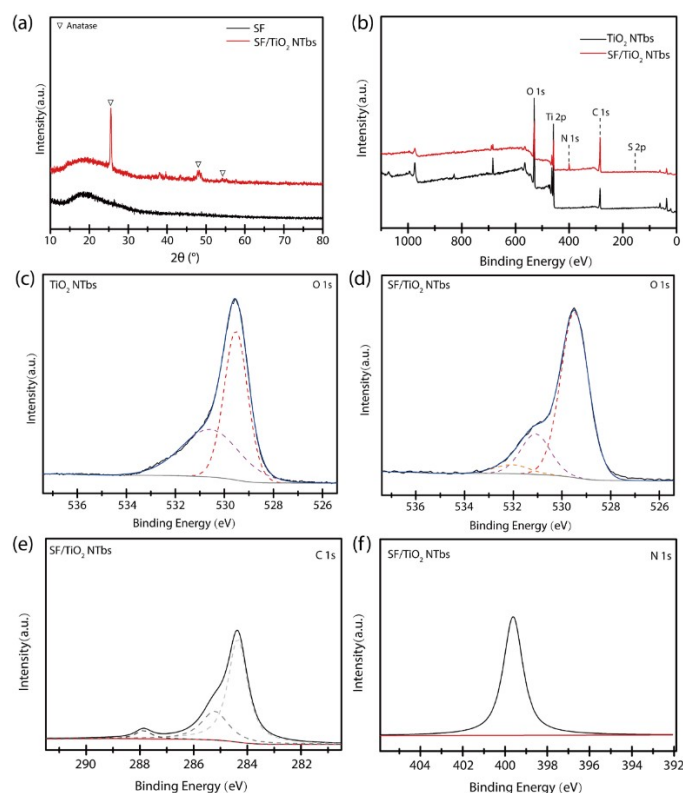

**Figure S4.** XRD pattern of TiO<sub>2</sub> NTbs and SF/TiO<sub>2</sub> NTbs (a), The XPS survey scan spectra of TiO<sub>2</sub> NTbs and SF/TiO<sub>2</sub> NTbs (b), O 1s spectra of TiO<sub>2</sub> NTbs (c) and SF/TiO<sub>2</sub> NTbs (d), C 1s spectra of SF/TiO<sub>2</sub> NTbs (e) and N 1s spectra of SF/TiO<sub>2</sub> NTbs (f).

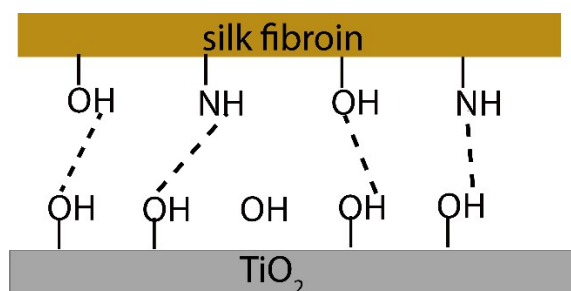

**Figure S5.** Hydrogen bonds between silk fibroin membrane and TiO<sub>2</sub> surface.

Figure S5 shows the schematic of hydrogen bonds between silk fibroin membrane and  $\text{TiO}_2$  surface. As we all know, the  $\text{TiO}_2$  NTbs showed efficient adsorption property because of its small size, big specific surface area and a lot of hydroxyl group, which probably forming hydrogen bonds with  $-\text{OH}$  or  $-\text{NH}$  in silk fibroin membrane.

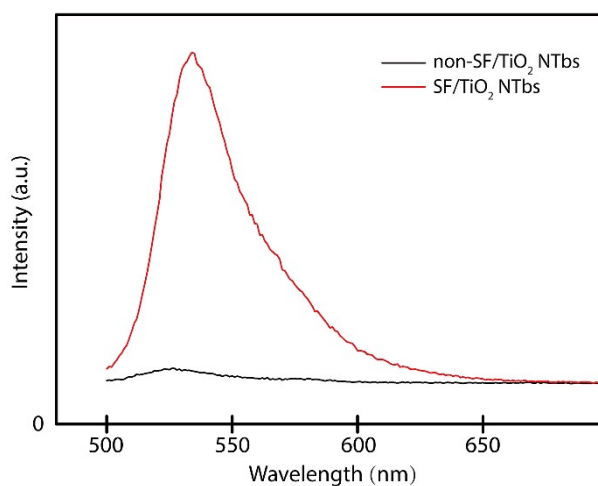

**Figure S6.** The fluorescence spectrum of singlet oxygen sensor green (SOSG) with and without SF/ $\text{TiO}_2$  NTbs after UV irradiation.

Singlet oxygen sensor green (SOSG) was used to evaluate the production of singlet oxygen. SOSG has a weak fluorescence at excitation/emission of 488 nm/527 nm and react quickly with singlet oxygen to form a high green fluorescent endoperoxide. Therefore, the increased intensity at the 527 nm emission peak proved the generation of singlet oxygen species.

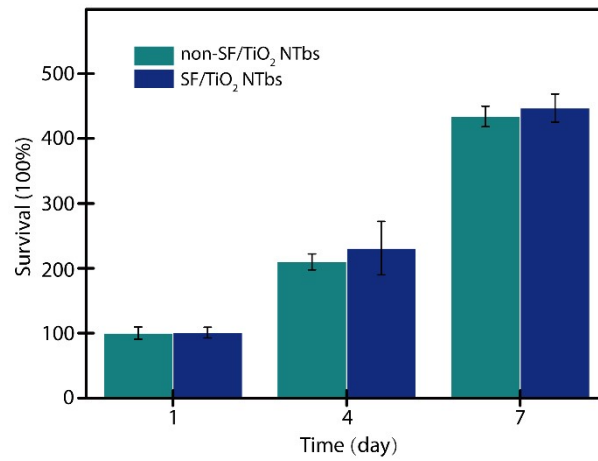

**Figure S7.** Cytotoxic effect of SF/TiO<sub>2</sub> NTbs against L929.

The biosafety of the membrane was tested by evaluating the cell viability of mouse fibroblast cell, L929 in the presence of SF/TiO<sub>2</sub> NTbs, as shown in Figure S7. It has been found that the SF/TiO<sub>2</sub> NTbs did not express obvious cytotoxicity, but the proliferation of cell.
